# Supplementary material for: An injectable hyaluronic acid hydrogel integrating Fe(iii)-coordination and polymyxin B grafts for accelerated healing of infected diabetic wounds
Source: Royal Society of Chemistry journal article supplement (doi:10.1039/d6ra03137d), 2026-06-03
Supplement: d6ra03137d3.pdf [file d6ra03137d3.pdf]

## Supporting Information

# An Injectable Hyaluronic Acid Hydrogel Integrating Fe(III)-Coordination and Polymyxin B Grafts for Accelerated Healing of Infected Diabetic Wounds

Mingchen Zhang <sup>a,†</sup>, Wei Zhao <sup>b,c,†</sup>, Yang Zhou <sup>b,c</sup>, Ruiting Shen <sup>a</sup>, Yiqiong Sun <sup>a</sup>, Lei Jiang <sup>b,c,d,\*</sup> and Jiantao Zhang <sup>c,d,\*</sup>

- a. Ningbo No. 2 Hospital, Ningbo 315010, PR China.
- b. Laboratory of Advanced Theranostic Materials and Technology, Ningbo Institute of Materials Technology and Engineering, Chinese Academy of Sciences, Ningbo 315201, PR China
- c. Ningbo Cixi Institute of Biomedical Engineering, Cixi 315300, PR China
- d. Zhejiang Key Laboratory of Biopharmaceutical Contact Materials, Ningbo 315201, China

† M.Z and W.Z. contributed equally to this work.

### **In Vitro Release of Polymyxin B and Fe<sup>3+</sup> from HA-B@Fe Hydrogel**

An accurately weighed sample of the HA-B<sub>3</sub>@Fe hydrogel (2.0 g) was placed into a 50 mL centrifuge tube containing 40 mL of phosphate-buffered saline (PBS, 0.01 M, pH 7.4) pre-warmed to 37 °C. The tube was incubated at 37 °C under continuous shaking at 100 rpm. At predetermined time intervals (10 min, 20 min, 40 min, 1 h, 2 h, 4 h, 6 h, 9 h, 12 h, and 24 h), 4.0 mL of the release medium was carefully withdrawn and replaced with an equal volume of fresh PBS (37 °C) to maintain sink conditions. The collected samples were immediately filtered through a 0.45 µm syringe filter and stored at 4 °C until analysis. The cumulative release of polymyxin B and Fe<sup>3+</sup> was calculated. Specifically, the concentration of polymyxin B in the release samples was determined by UV–Vis spectrophotometry (Cary 3000, Agilent, USA). Absorbance was measured at 215 nm using a quartz cuvette with a 1 cm path length. The concentration of Fe<sup>3+</sup> ions in the release medium was measured by flame atomic absorption spectrometry (FAAS, Arcos, Spectro, Germany). The operating wavelength was set at 248.3 nm, with a slit width of 0.2 nm and an air–acetylene flame. All release samples were acidified with 2% (v/v) HNO<sub>3</sub> prior to analysis to ensure complete atomization. The cumulative release (%) of polymyxin B and Fe<sup>3+</sup> at each time point was calculated using the following equation:

$$\text{Cumulative release (\%)} = \frac{C_n \times V_0 + \sum_{i=1}^{n-1} C_i \times V_e}{m_{total}} \times 100$$

Where  $C_n$  is the concentration of the analyte at time point  $n$ ,  $V_0$  is the total volume of the release medium (40 mL),  $V_e$  is the volume of medium withdrawn at each sampling (4 mL), and  $m_{total}$  is the total amount of polymyxin B or Fe<sup>3+</sup> initially present in the hydrogel.

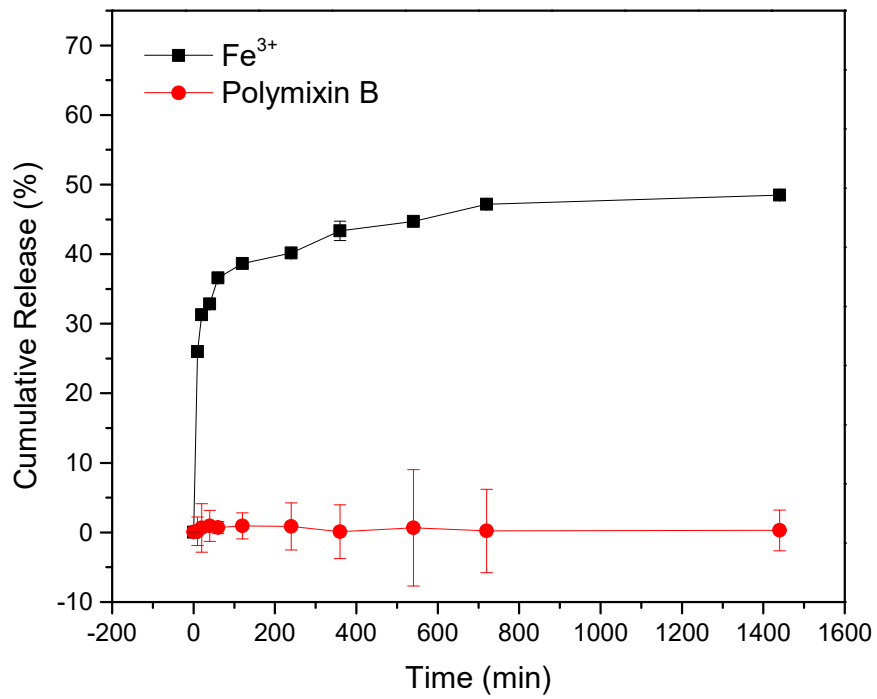

**Fig. S1** *In vitro* cumulative release profiles of polymyxin B and Fe<sup>3+</sup> from the HA-B@Fe hydrogel in phosphate-buffered saline (PBS, 0.01 M, pH 7.4) at 37 °C. Data are presented as mean ± SD (n = 3).
